# Supplementary material
Source: PubMed Central journal article supplement (PMC3205598)
Supplement: es202351y_si_001.pdf [file es202351y_si_001.pdf]

# Supporting information

for

Connecting the dots: responses of coastal ecosystems to changing  
nutrient concentrations

Jacob Carstensen<sup>1\*</sup>, María Sánchez-Camacho<sup>2</sup>, Carlos M. Duarte<sup>2,3</sup>, Dorte Krause-  
Jensen<sup>1</sup>, Núria Marbà<sup>2</sup>

<sup>1</sup> Department of Bioscience, Aarhus University, Frederiksborgvej 399, DK-4000 Roskilde, Denmark

<sup>2</sup> Department of Global Change Research, IMEDEA (CSIC-UIB), Instituto Mediterráneo de Estudios Avanzados, Miquel Marquès 21, 07190 Esporles (Illes Balears), Spain

<sup>3</sup> The UWA Oceans Institute, University of Western Australia, 35 Stirling Highway, Crawley 6009, Australia

\* Corresponding author phone: +45 46301345; fax +45 46301114; email: jac@dmu.dk

Summary: 3 pages, 2 figures

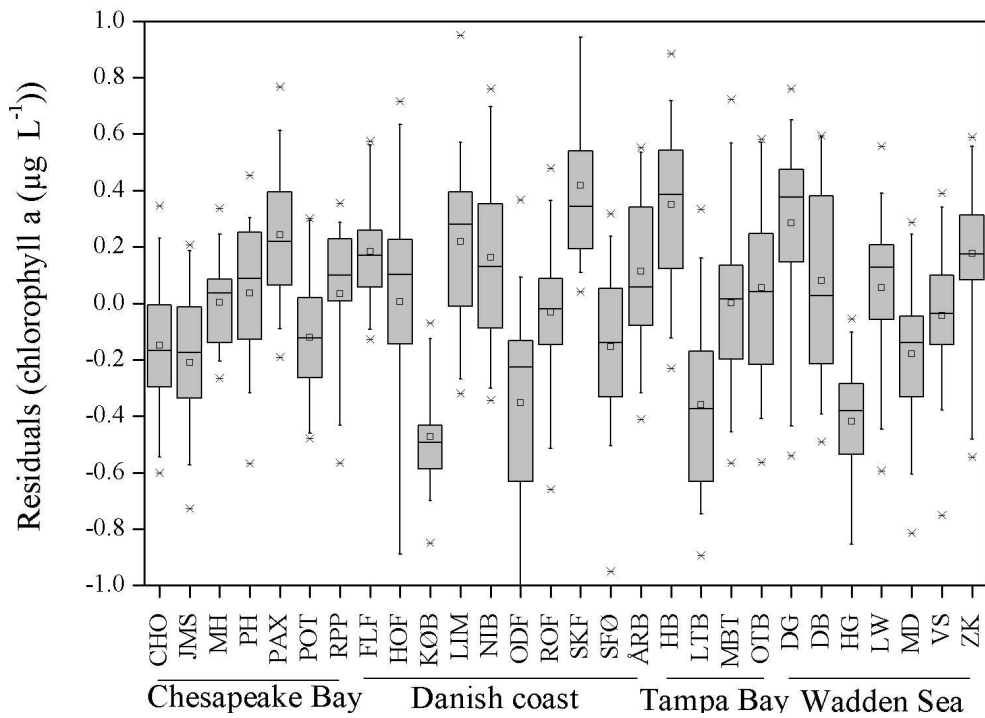

Figure S1: Box and whiskers plot for residuals from region-specific regression of  $\log(\text{Chla})$  vs.  $\log(\text{TN})$ . Boxes show lower and upper quartiles with median (line) and mean (square) inside the box. Whiskers mark the 95% confidence intervals, crosses the 1<sup>st</sup> and 99<sup>th</sup> percentiles, and dash symbols show minimum and maximum values. For ecosystem abbreviations see Table 1.

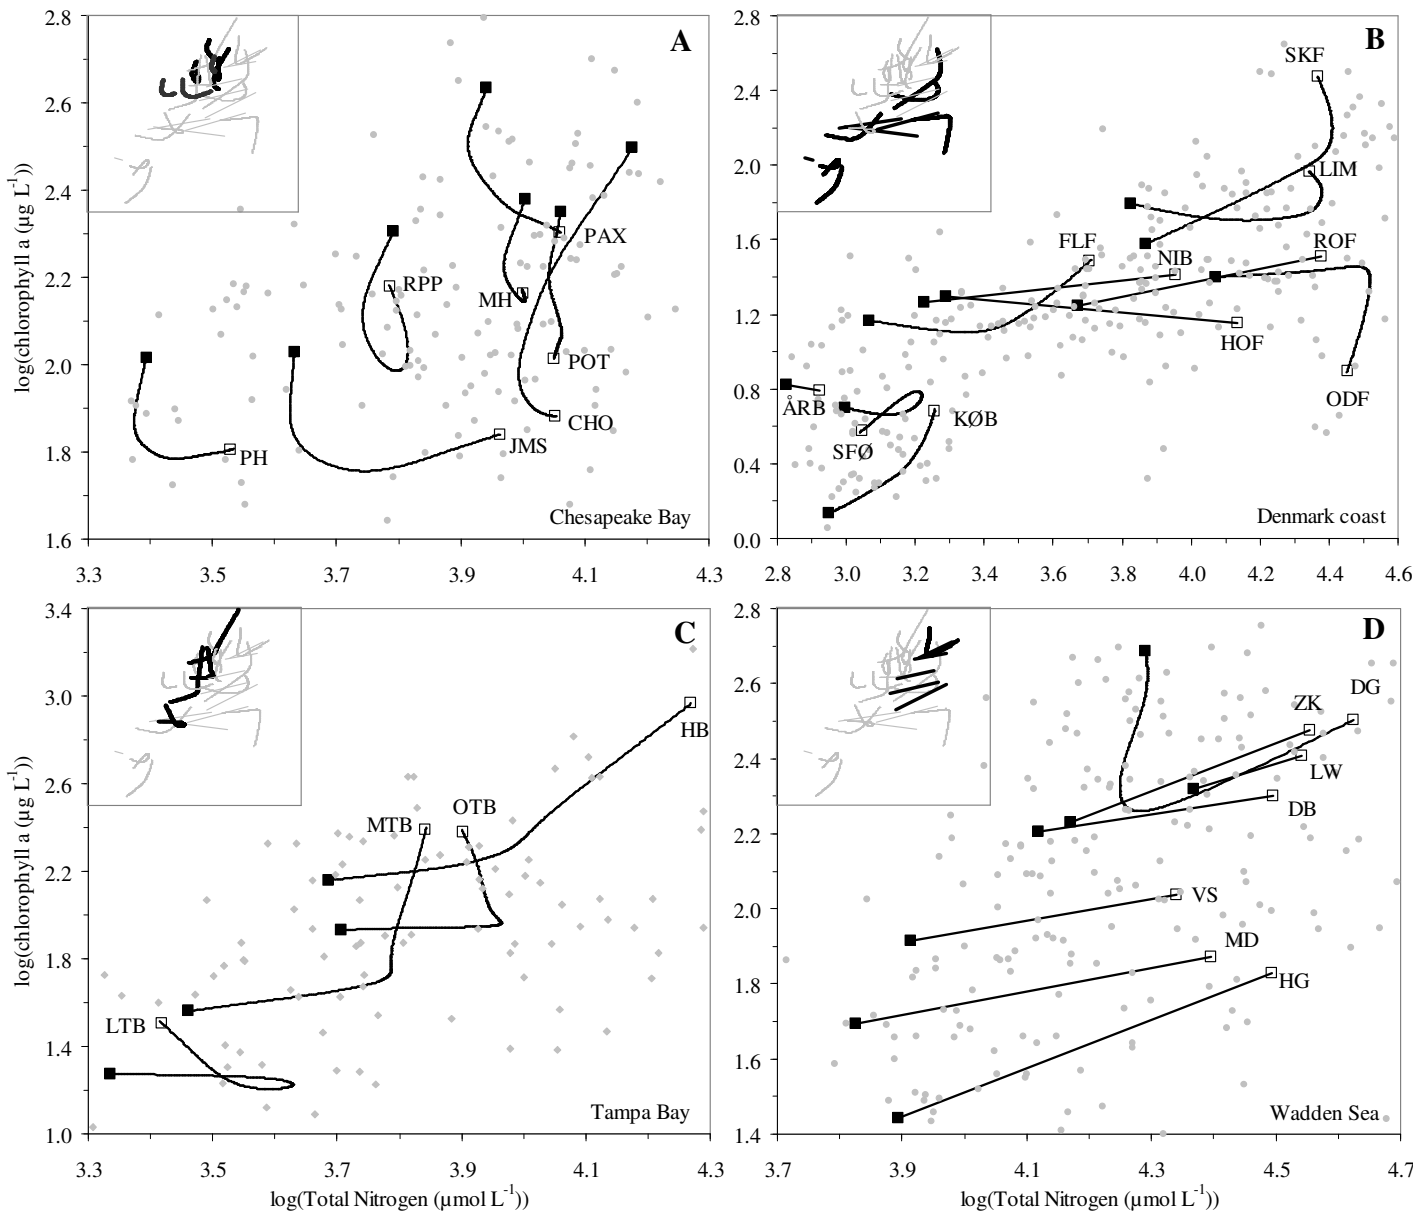

Fig. S2: Smoothed time trajectories, obtained by means of GAM, of the  $\log(\text{Chla})$  vs.  $\log(\text{TN})$  relationships for the 28 ecosystems representing the four regions. Open and filled symbols mark the start and end of the trajectories (ecosystem abbreviations, see Table 3, are listed with the starting point) and the annual means used for computing the trajectories are shown by gray dots. Inserts show the location of the region-specific trajectories (thick black lines, see also Fig. S2) compared to the trajectories from the other regions. Linear relationships are shown for ecosystems ( $n=10$ ), where time departures from a stationary power relationship between Chla and TN was not significant (Table 3).
